# Supplementary material
Source: PubMed Central journal article supplement (PMC3641151)
Supplement: NIHMS433323-supplement-01.pdf [file NIHMS433323-supplement-01.pdf]

## Anomalous Use of Context During Task Preparation in Schizophrenia: A Magnetoencephalography Study

### *Supplemental Information*

#### Trial Exclusions for MEG Analysis

As in our prior report (1), we excluded trials with no response, those that were unscorable due to a noisy electrooculogram (EOG) signal, trials with latencies under 130 or over 800 ms, and trials preceded by an error. The cutoff of 130 ms excluded anticipatory saccades, which are not true responses to the appearance of the stimulus (2-4). The rationale for excluding trials preceded by an error is that errors initiate evaluative and corrective processes that affect neural activity and behavior (e.g., post-error slowing) in the subsequent trial and these effects differ for patients and controls (e.g., 5). Trials with eye-blinks (defined as vertical peak-to-peak EOG amplitude exceeding 200  $\mu$ V) or losses of fixation during the baseline period or prior to the saccadic response were excluded from analysis. After exclusion, there were an average of  $139 \pm 71$  prosaccades and  $129 \pm 72$  antisaccades available for MEG analysis for each patient and  $201 \pm 38$  prosaccades;  $196 \pm 45$  antisaccades available for controls.

**Table S1.** Breakdown of trial exclusions for MEG analysis.

|                   | Controls   |    |             |    | Patients   |    |             |    |
|-------------------|------------|----|-------------|----|------------|----|-------------|----|
|                   | Prosaccade |    | Antisaccade |    | Prosaccade |    | Antisaccade |    |
|                   | #          | %  | #           | %  | #          | %  | #           | %  |
| Blinks +          | 37         | 13 | 37          | 13 | 82         | 30 | 79          | 28 |
| Loss of Fixation  | 7          | 3  | 6           | 2  | 23         | 8  | 20          | 7  |
| Preceded by Error | 23         | 8  | 19          | 7  | 23         | 8  | 13          | 5  |
| Usable Errors     | 10         | 4  | 27          | 10 | 11         | 4  | 44          | 15 |
| Usable Correct    | 201        | 72 | 196         | 69 | 139        | 50 | 129         | 45 |

There were a total of 278 prosaccades and 285 antisaccades in the experiment. Latency and error rate analyses included all scorable trials, regardless of blinks, losses of fixation, or prior errors. The 'Blinks +' category includes blinks, trials with response latencies <130 ms and >800 ms, trials with no response, and unscorable trials. Patients had fewer usable trials due to their higher error rate, increased difficulty adhering to the instruction not to blink, and, as we have reported previously (6), higher rate of fixation losses than controls.

## Bootstrapping Analyses

These analyses consisted of four steps: 1) generating a normalized difference score distribution for each group by using 10,000 bootstrap samples through random draws with replacements in each group ( $n = 25$  for the patient group and  $n = 18$  for the control group); 2) constructing the receiver operating characteristic (ROC) curve by using the two distributions generated by the above bootstrapping procedure from each group; 3) calculating the area under the ROC curve, which provides a model-free, unbiased estimation of overlap between the groups; 4) computing the  $p$ -value of the ROC area value by comparing it with a null-hypothesis distribution of the ROC area value, generated by repeating the procedure 10,000 times as described in the above 3 steps except that in step 1, the group assignment is randomly assigned.

1. Lee AKC, Hämäläinen MS, Dyckman KA, Barton JJS, Manoach DS (2011): Saccadic preparation in frontal eye field is modulated by distinct trial history effects as revealed by magnetoencephalography. *Cerebral Cortex*. 21:245-253.
2. Fischer B, Breitmeyer B (1987): Mechanisms of visual attention revealed by saccadic eye movements. *Neuropsychologia*. 25:73-83.
3. Doricchi F, Perani D, Inocchia C, Grassi F, Cappa SF, Bettinardi V, *et al.* (1997): Neural control of fast-regular saccades and antisaccades: an investigation using positron emission tomography. *Exp Brain Res*. 116:50-62.
4. Straube A, Riedel M, Eggert T, Müller N (1999): Internally and externally guided voluntary saccades in unmedicated and medicated schizophrenic patients. Part I. Saccadic velocity. *Eur Arch Psychiatry Clin Neurosci*. 249:1-6.
5. Kerns JG, Cohen JD, MacDonald AW, 3rd, Johnson MK, Stenger VA, Aizenstein H, *et al.* (2005): Decreased conflict- and error-related activity in the anterior cingulate cortex in subjects with schizophrenia. *Am J Psychiatry*. 162:1833-1839.
6. Barton JJ, Pandita M, Thakkar K, Goff DC, Manoach DS (2008): The relation between antisaccade errors, fixation stability and prosaccade errors in schizophrenia. *Exp Brain Res*. 186:273-282.
